# Supplementary material for: Amide-containing luminescent metal–organic complexes as bifunctional materials for selective sensing of amino acids and reaction prompting
Source: Royal Society of Chemistry journal article supplement (doi:10.1039/c5ra27806f), 2016-01-01

# **Amide-containing Luminescent Metal–organic Complexes as Bifunctional Materials for Selective Sensing of Amino Acid and Reaction Prompting**

Pengyan Wu,<sup>a</sup> Min Jiang,<sup>a</sup> Xuefu Hu,<sup>b</sup> Jingru Wang,<sup>a</sup> Guangjie He,<sup>c,\*</sup> Ying Shi,<sup>a</sup> Yang Li,<sup>a</sup> Wei Liu<sup>a</sup> and Jian Wang<sup>a,\*</sup>

<sup>a</sup> *School of Chemistry and Chemical Engineering & Jiangsu Key Laboratory of Green Synthetic Chemistry for Functional Materials, Jiangsu Normal University, Xuzhou, Jiangsu, 221116, People's Republic of China;*

<sup>b</sup> *State Key Laboratory of Physical Chemistry of Solid Surfaces, College of Chemistry and Chemical Engineering, Xiamen University, Xiamen, 361005, P. R. China.*

<sup>c</sup> *Department of Forensic Medicine, Xinxiang Medical University, XinXiang, 453003, China.*

## **Contents**

|                                                                    |            |
|--------------------------------------------------------------------|------------|
| <b>1. NMR, MS Data of ligands and Characterization of Ce–TBAS.</b> | <b>S2</b>  |
| <b>2. Studies on the amino acids sensing based on Ce–BBAS.</b>     | <b>S5</b>  |
| <b>3. Studies on the amino acids sensing based on Ce–TBAS.</b>     | <b>S8</b>  |
| <b>4. Association Constant Calculations and Figure S6.</b>         | <b>S11</b> |
| <b>5. Studies on the aldehydes sensing based on Ce–TBAS.</b>       | <b>S12</b> |
| <b>6. Studies on the aldehydes sensing based on Ce–BBAS.</b>       | <b>S13</b> |

# 1. NMR, MS Data of ligands and Characterization of Ce-TBAS.

## 1.1 Figure S1 NMR and MS data of H<sub>4</sub>BBAS.

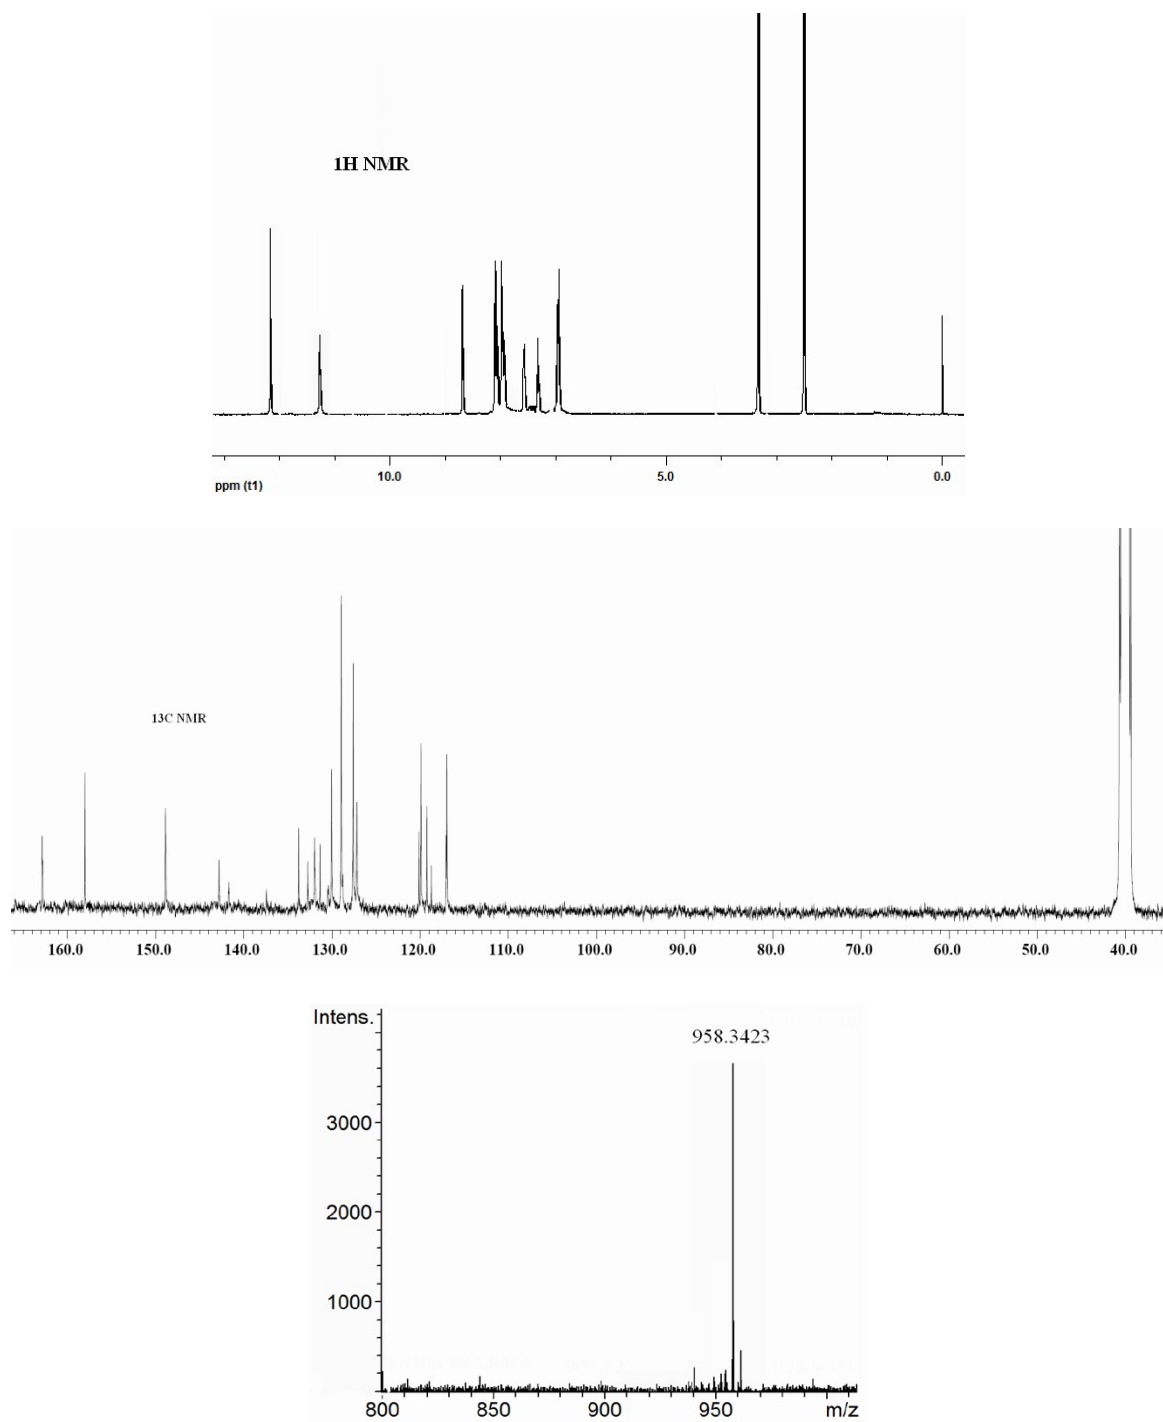

## 1.2 Figure S2 NMR and MS data of H<sub>6</sub>TBAS.

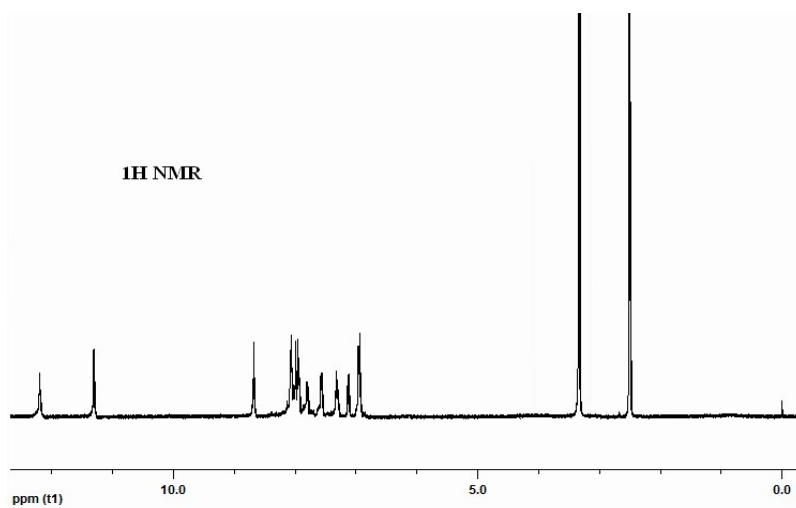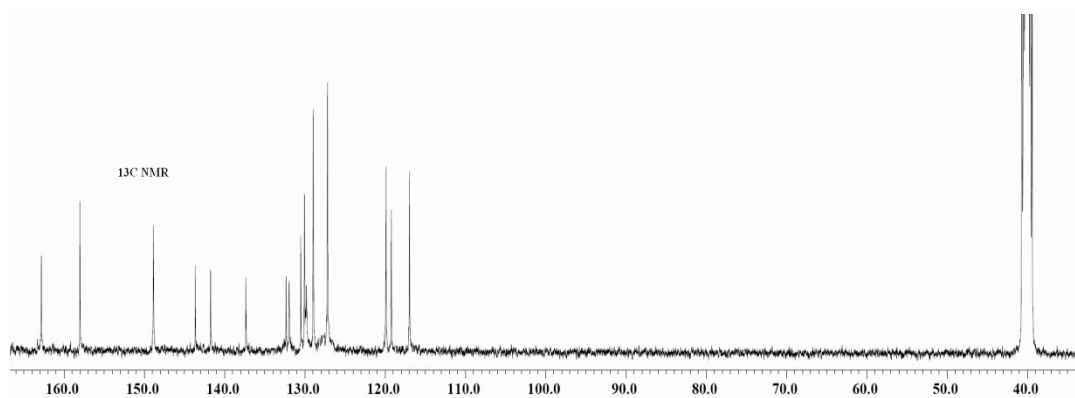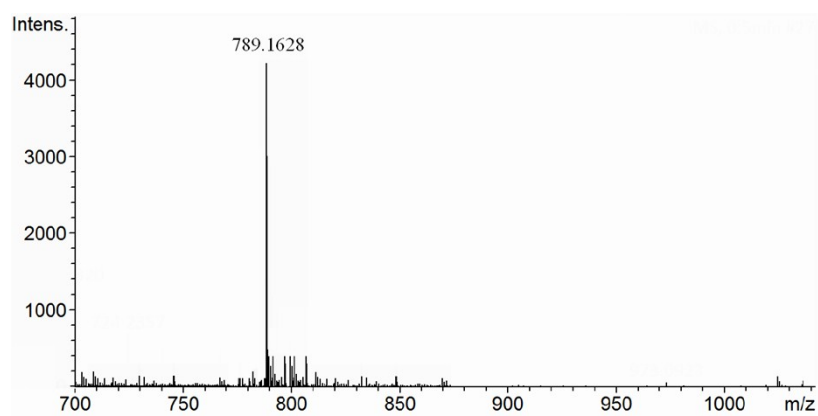

### 1.3. Characterization of Ce–TBAS.

#### 1.3.1 Figure S3 ESI-MS of Ce–TBAS (0.1 mM) in DMF/CH<sub>3</sub>OH in present of KOH (0.1 mM).

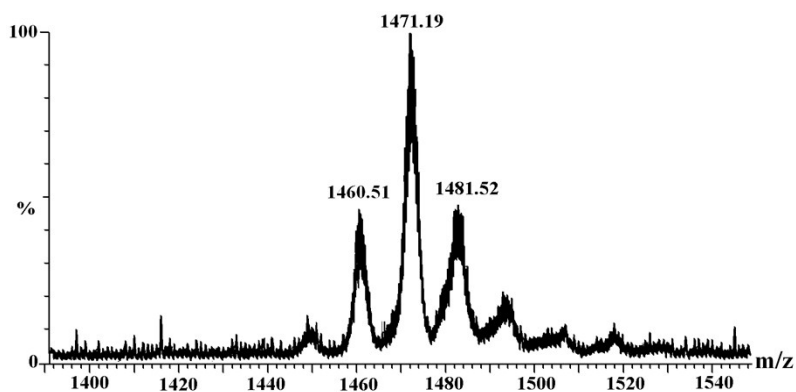

| Peak number | value   | Specie Assigned                                                                                    |
|-------------|---------|----------------------------------------------------------------------------------------------------|
| 1           | 1460.51 | [Ce(IV) <sub>4</sub> (HTBAS) <sub>3</sub> (H <sub>2</sub> TBAS)] <sup>3-</sup>                     |
| 2           | 1471.19 | [Ce(IV) <sub>4</sub> (HTBAS) <sub>3</sub> (H <sub>2</sub> TBAS)(CH <sub>3</sub> OH)] <sup>3-</sup> |
| 3           | 1481.52 | [Ce(IV) <sub>4</sub> (HTBAS) <sub>3</sub> (H <sub>2</sub> TBAS)(HNO <sub>3</sub> )] <sup>3-</sup>  |

#### 1.3.2 Figure S4 The relative <sup>1</sup>H NMR spectra of H<sub>6</sub>TBAS and Ce–TBAS in DMSO-d<sub>6</sub>.

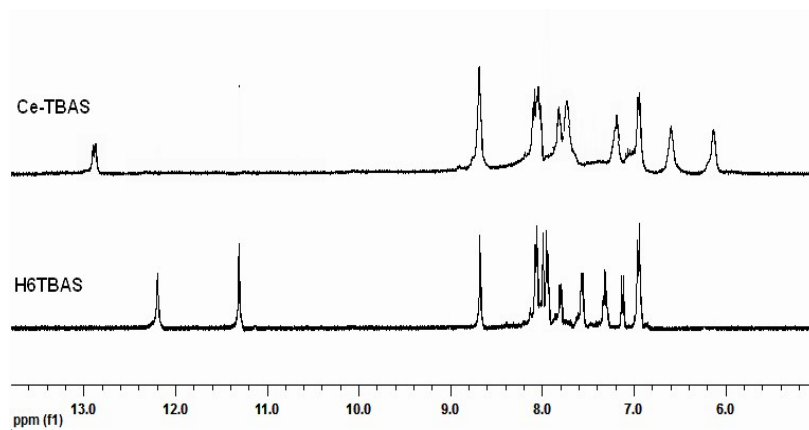

The disappearance of the phenolic proton signal at ~11.31 ppm and the significant upfield shift of aromatic protons in the phenol ring suggested the coordination occurred between the deprotonated phenolic groups and the metal ions. The downfield shift from 12.20 to 12.91 ppm and the reduction of the proton portion of the amide signal were indicative of the coordination of amide groups to the metal ions and the partial deprotonation of amide groups during the coordination process.

## 2. Studies on the amino acids sensing based on Ce-BBAS.

**2.1 Figure S5** Uv-vis absorption spectra of H<sub>4</sub>BBAS, Ce-BBAS and Ce-BBAS upon the addition of Asp up to 0.13 mM.

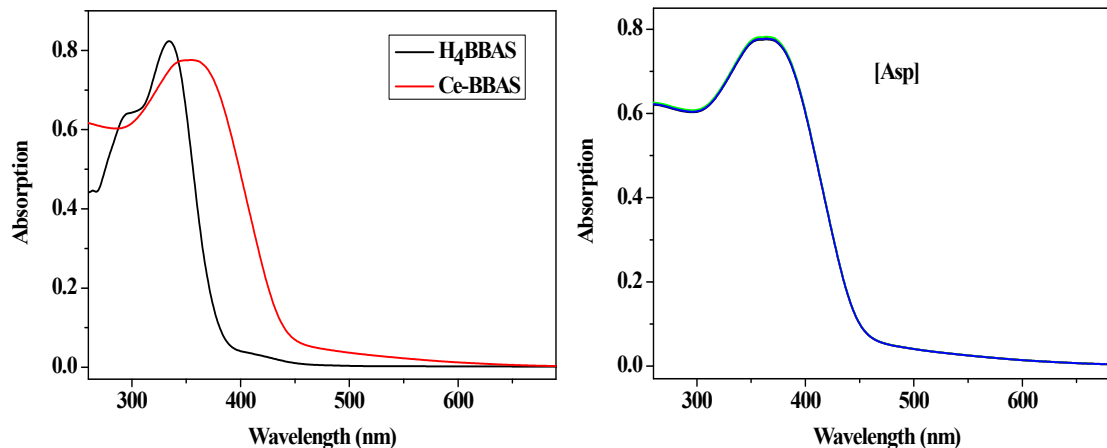

**2.2 Figure S6** XPS spectra of Ce 3d from surface and near surface region of Ce-BBAS.

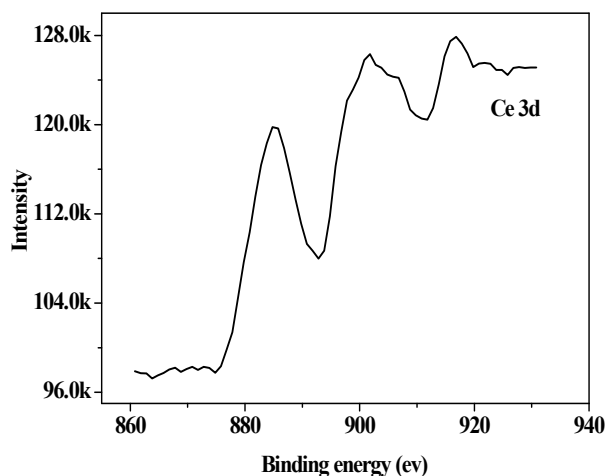

Ce 3d: 885.2, 901.4, 906.6, 916.5 eV. Typically the Ce 3d core level XPS spectrum exhibits three distinct regions of envelopes (around 880-890 eV, 895-910 eV and approximately 916 eV). The peak at a binding energy of 916 eV is normally used as the spectroscopic marker to detect the presence of the Ce<sup>IV</sup> state and is usually assigned to 4f<sup>0</sup> orbital transitions. The Ce 3d picture show the multiplet peaks of Ce 3d with the peak at 885.2, 901.4, 906.6, 916.5 eV are assigned to the presence of two Ce<sup>IV</sup> ions of Ce-BBAS in the solid state. (F. Larachi, J. Pierre, A. Adnot, A. Bernis, *Appl. Surf. Sci.* 2002, **195**, 236; P. Datta, P. Majewski, F. Aldinger, *Mater. Charact.* 2009, **60**, 138.)

**2.3 Figure S7** Families of various fluorescence spectra of Ce-BBAS in DMF/H<sub>2</sub>O = 8/2 solution upon the addition of 0.13 mM of different selected analytes.

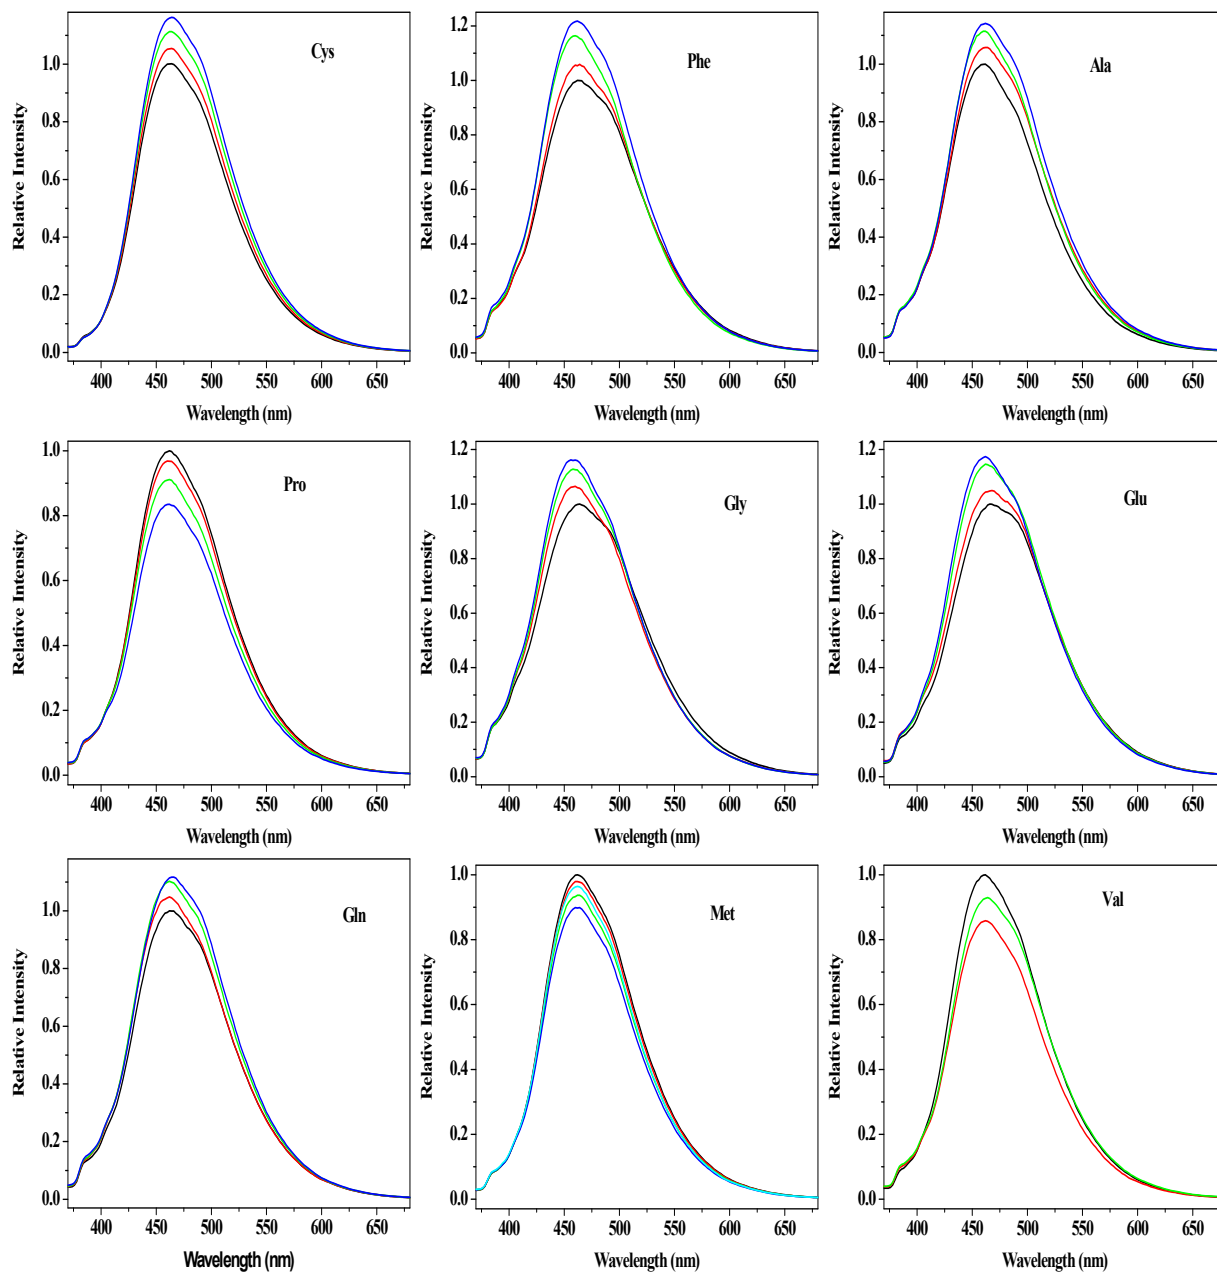

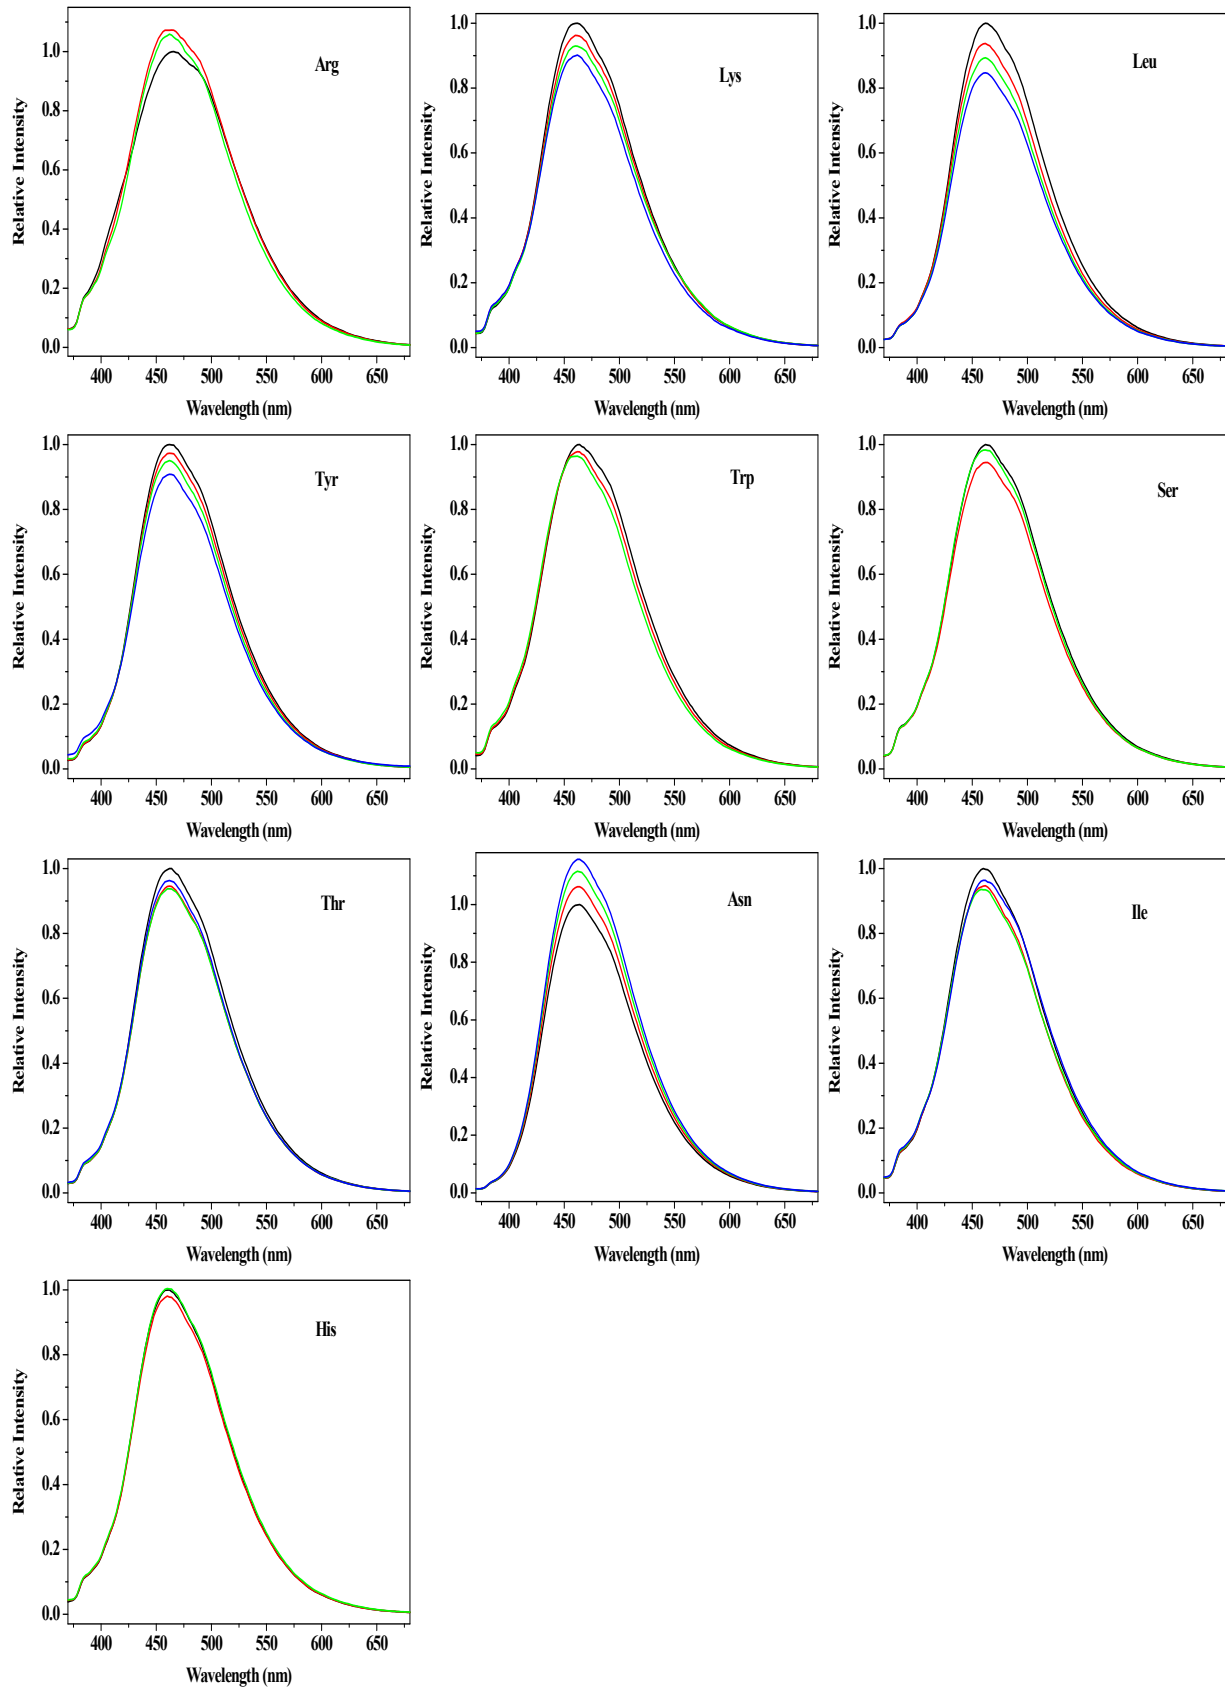

### 3. Studies on the amino acids sensing based on Ce-TBAS.

#### 3.1 Figure S8 Uv-vis absorption spectra of H<sub>6</sub>TBAS and Ce-TBAS.

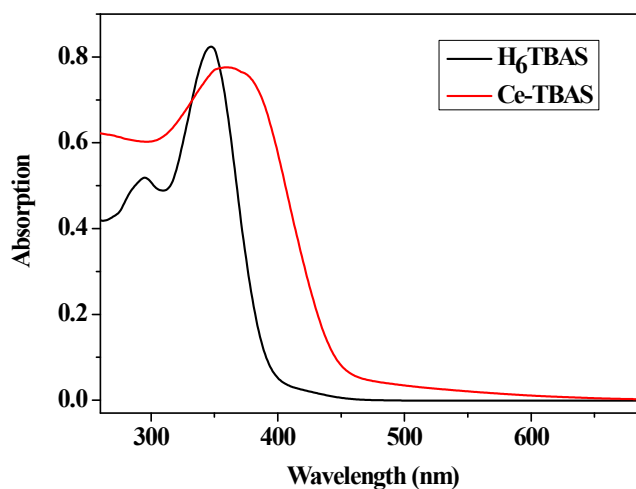

#### 3.2 Figure S9 The fluorescence spectra of Ce-TBAS (15 μM) in DMF/H<sub>2</sub>O = 8/2 solution upon the addition of 0.13 mM of various amino acids.

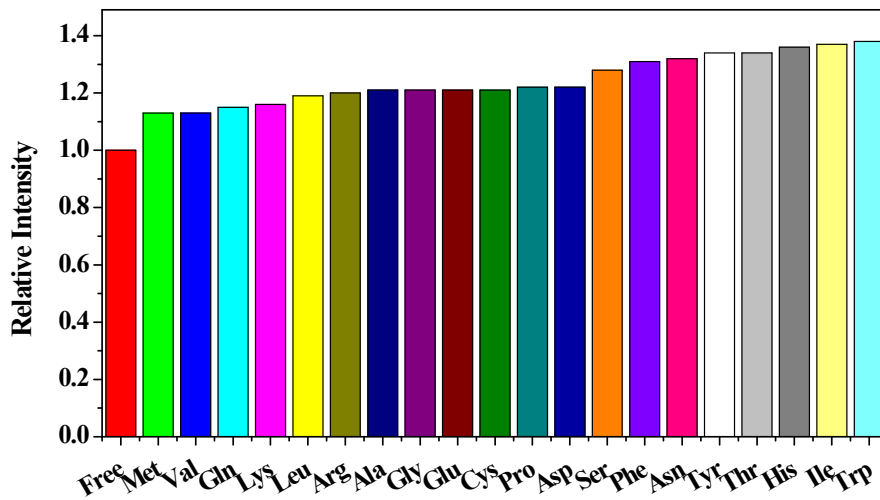



**3.3 Figure S10** Families of various fluorescence spectra of Ce–TBAS in DMF/H<sub>2</sub>O = 8/2 solution upon the addition of 0.13 mM of different selected analytes.

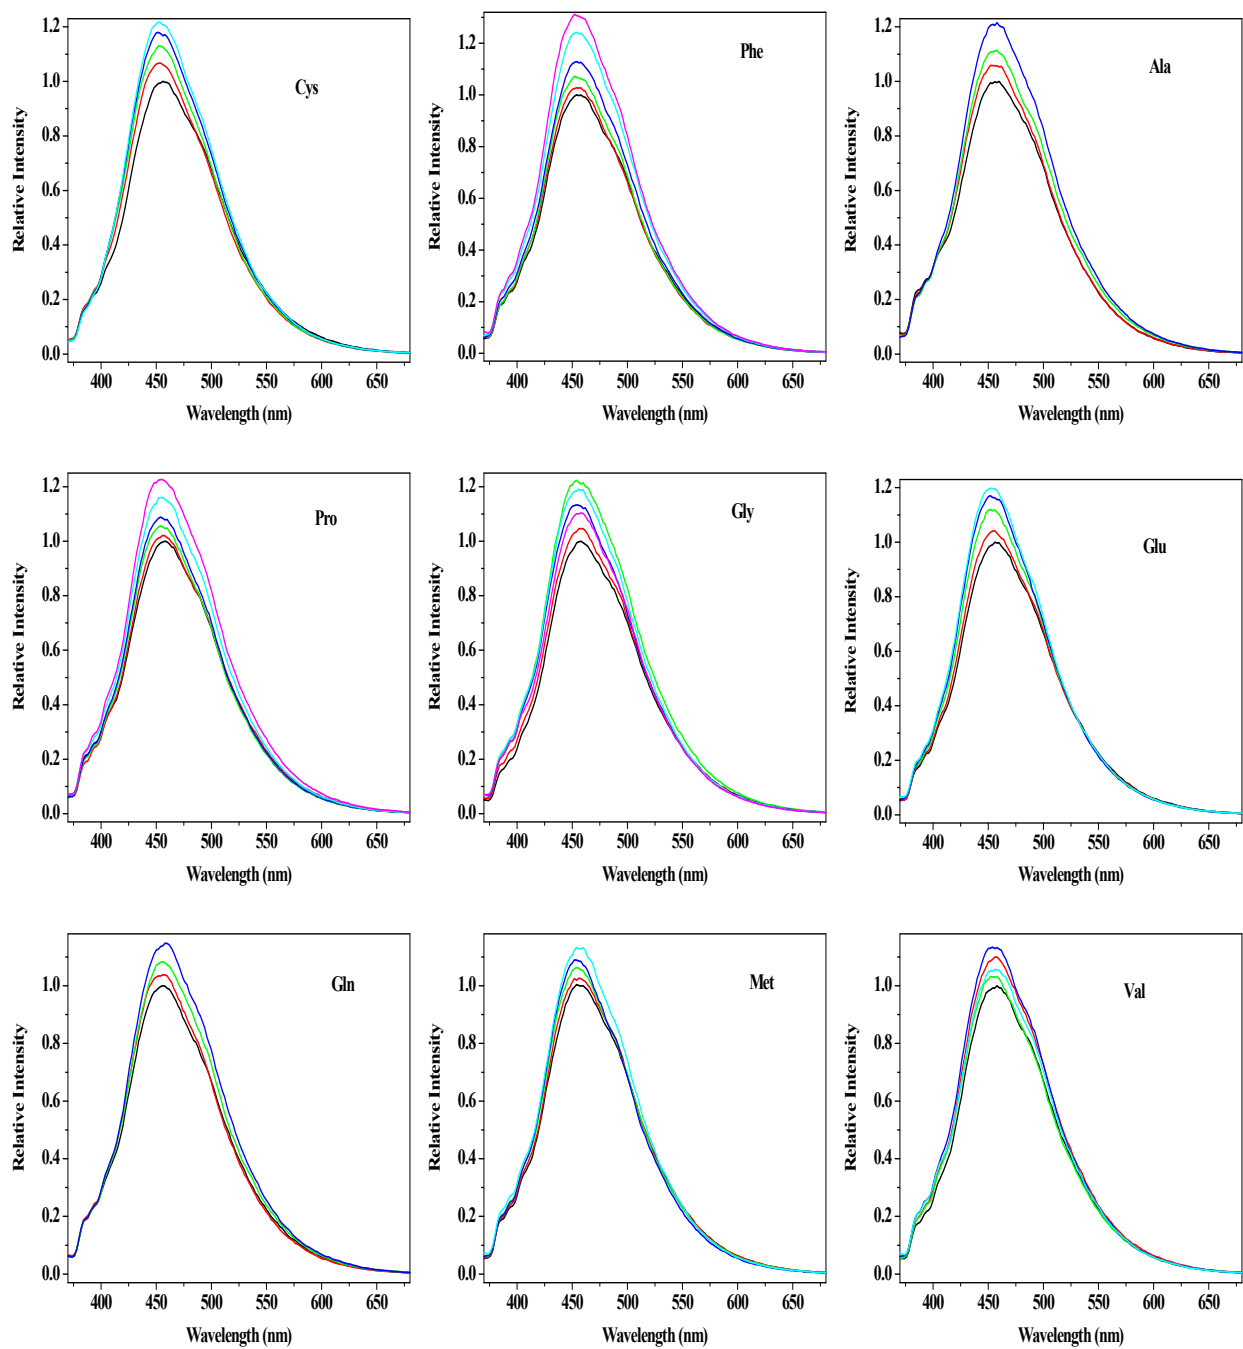

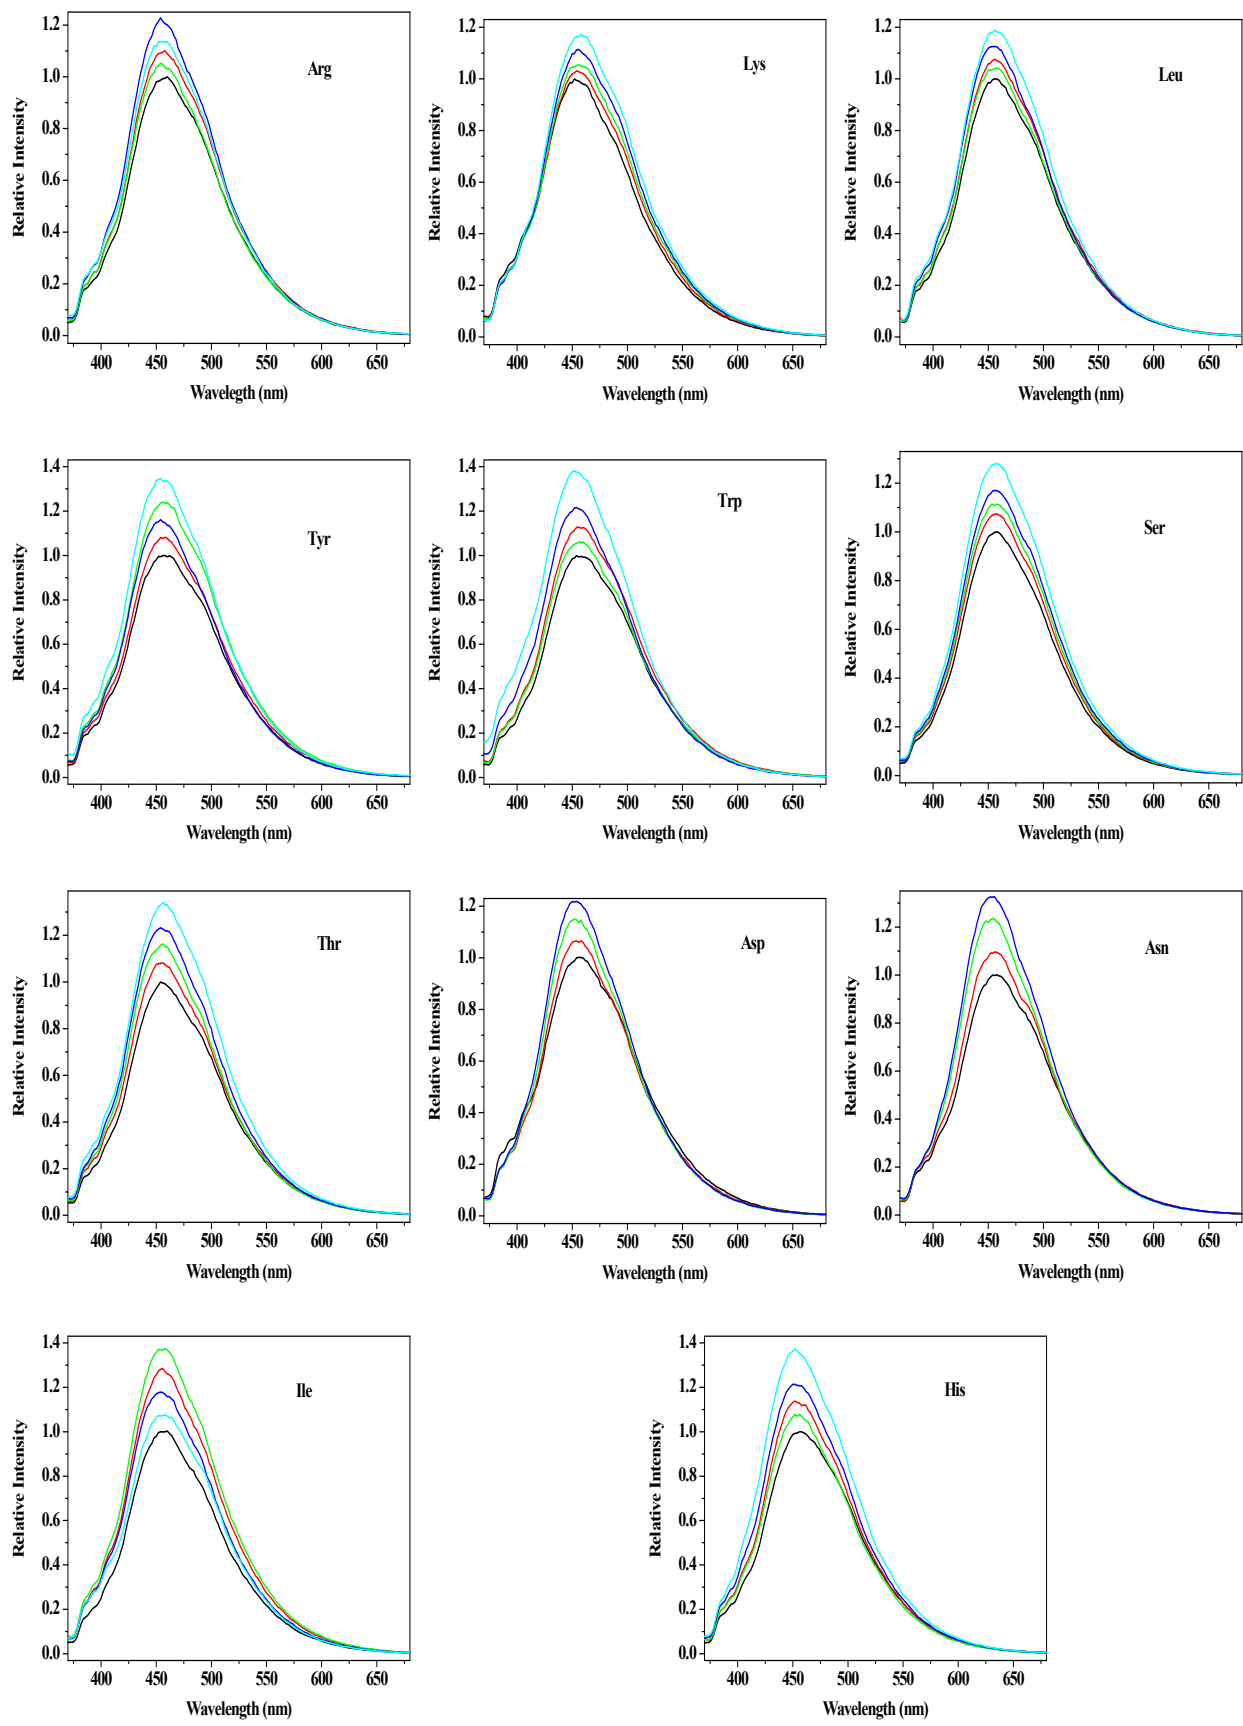

#### 4. Association Constant Calculations and Figure S11.

Generally, for the formation of Host-Guest complexation species formed by the cage compound host (H) and the guest (G), if we assume  $x C_0$  to be the concentration of complexed species Host-Guest (H-G), when the concentration of the added guest is  $n C_0$  with the original concentration of the cage being fixed at  $C_0$ :

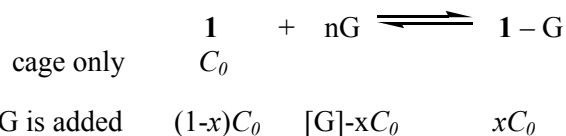

$$\text{While } [\mathbf{G}] \gg xC_0, \quad K = x / [1-x][\mathbf{G}]^n \quad (1)$$

The measurements are performed under the conditions where the luminescence intensity of the free host (H) in such a concentration is  $F_0$ ; after addition of a given amount ( $n C_0$ ) of G, the fluorescent intensity becomes:

$$F = F_1 x + F_0 (1-x) \quad (2)$$

Where  $F_1$  is the luminescence of the saturated value in the presence of excess guest.

It is easy to derive the usual equation:

$$(F-F_0) / (F_1-F_0) = x \quad (3)$$

From eqs (1) and (3), we can obtain the equation:

$$\log[(F-F_0)/(F_1-F_0)] = \log K + n \log[G] \quad (4)$$

$K_s$  can be obtained by a linear analysis of (X)  $\log[G]$  versus (Y).  $\log[(F-F_0)/(F_1-F_0)]$

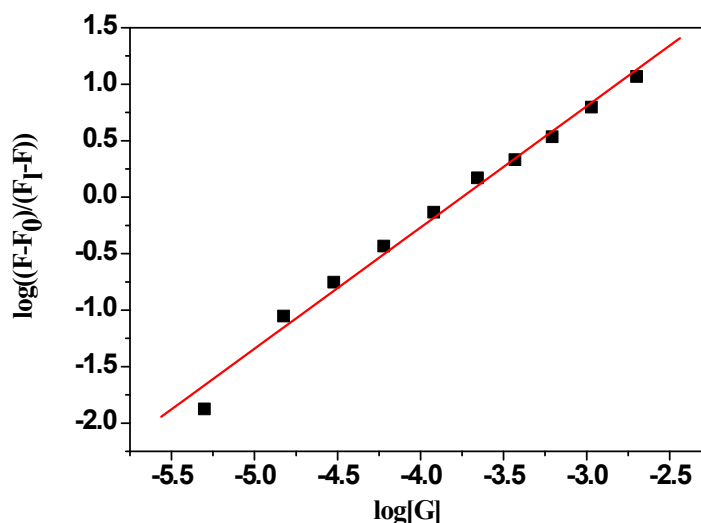

$$R = 0.994;$$

$$\log K = 4.03 \pm 0.11;$$

$$n = 1.03.$$

## 5. Studies on the aldehydes sensing based on Ce–TBAS.

5.1 Figure S12 Families of various fluorescence spectra of Ce–TBAS in DMF solution upon the addition of 0.3 mM of different selected aldehydes.

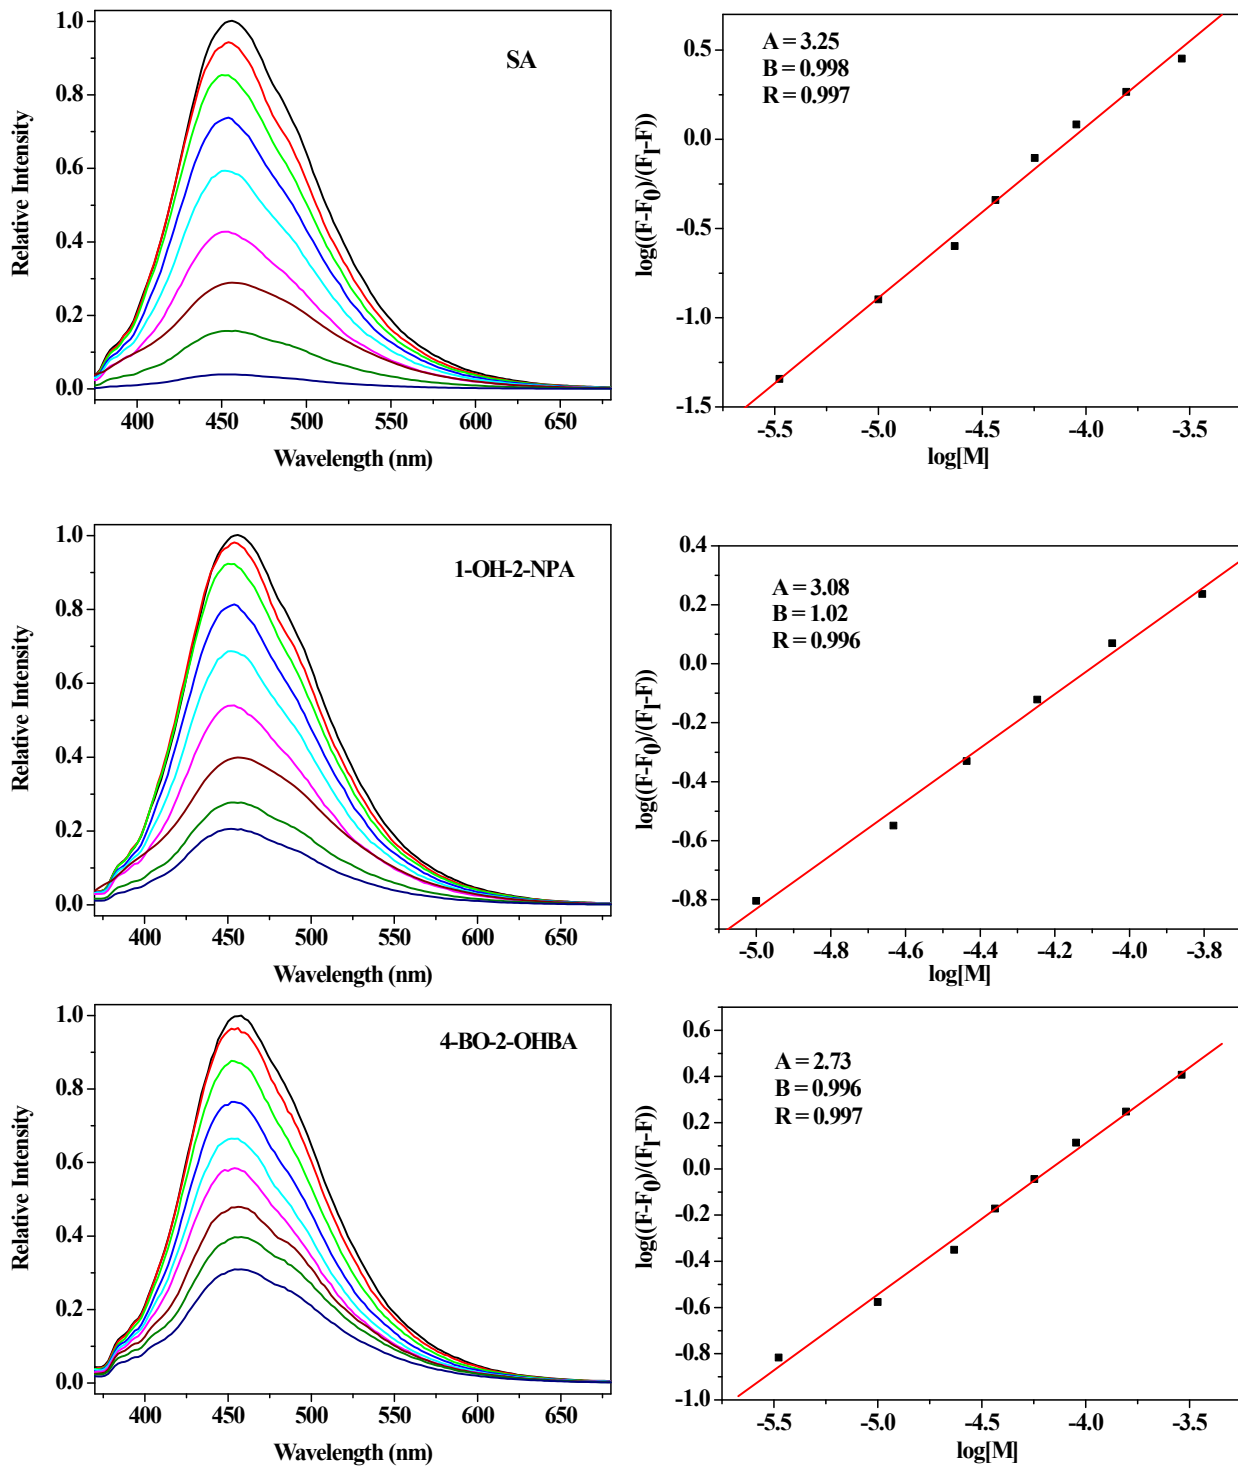

## 6. Studies on the aldehydes sensing based on Ce-BBAS.

6.1 Figure S13 Families of various fluorescence spectra of Ce-BBAS in DMF solution upon the addition of 0.3 mM of different selected aldehydes.

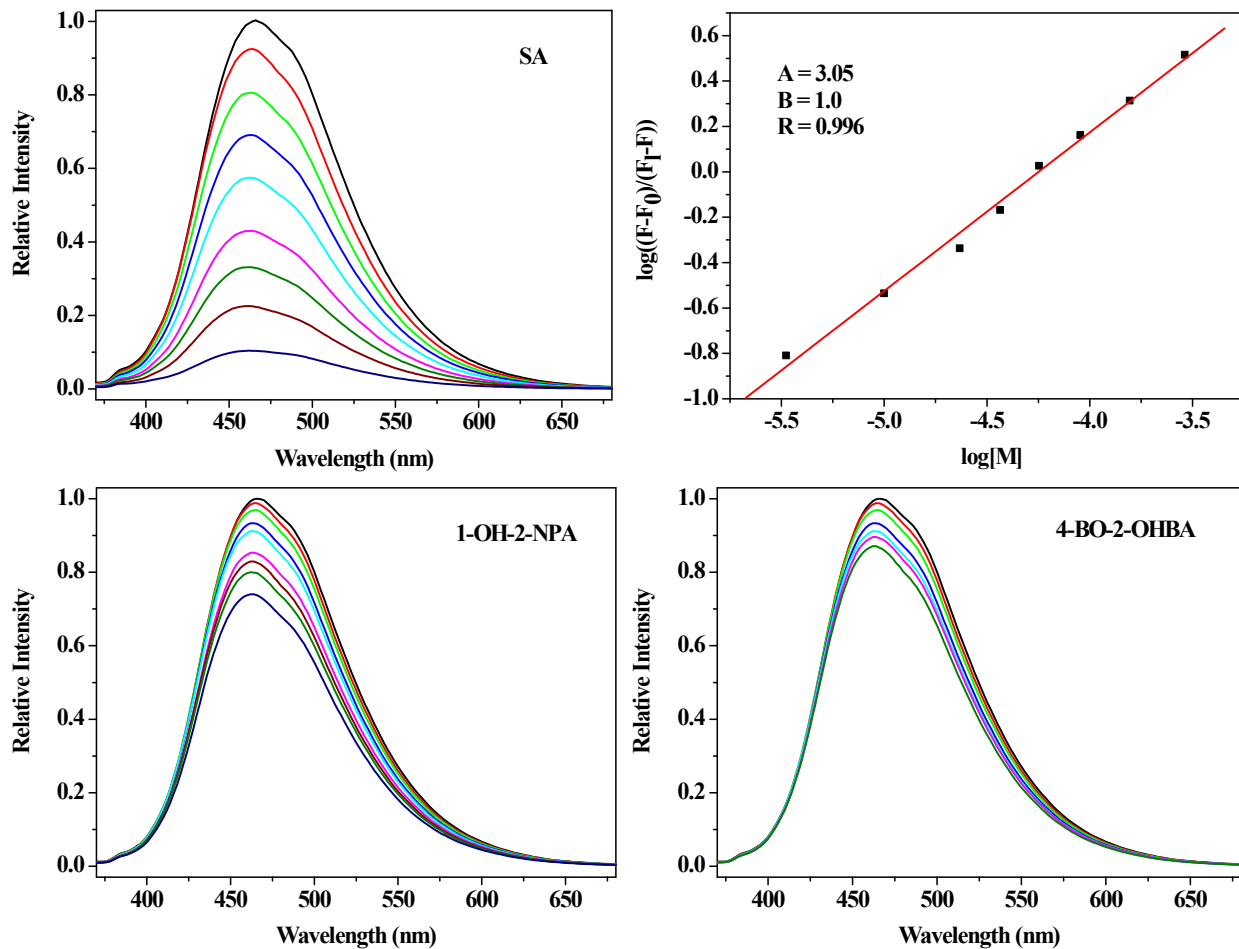

Supplement: c5ra27806f1.pdf [file c5ra27806f1.pdf]
